# Supplementary material for: National priority setting partnership using a Delphi consensus process to develop neonatal research questions suitable for practice-changing randomised trials in the UK
Source: HighWire-hosted journal article supplement (doi:10.1136/archdischild-2023-325504), 2023-04-24
Supplement: archdischild-2023-325504supp001_data_supplement.pdf [file archdischild-2023-325504supp001_data_supplement.pdf]

**Online supplementary eText 1: Members of the Neonatal Priority Setting Partnership Steering Group.**

| <b><u>Steering Group Member</u></b> | <b><u>Role and affiliation</u></b>                                                                                                        |
|-------------------------------------|-------------------------------------------------------------------------------------------------------------------------------------------|
| Cheryl Battersby (CB)               | Academic Neonatologist, British Association of Perinatal Medicine (BAPM) Data/Informatics lead & member of NIHR prioritisation committee. |
| James Boardman (JPB)                | Professor of Neonatal Medicine and immediate past president of the Neonatal Society.                                                      |
| Elaine Boyle (EB)                   | Professor of Neonatal Medicine and Chair of the National Institute for Health Research Neonatal Clinical Studies Group.                   |
| William Carroll (WC)                | Consultant Paediatrician and Royal College of Paediatrics and Child Health (RCPCH) officer for Research.                                  |
| Jon Dorling (JD)                    | Professor of Paediatrics, Neonatal Consultant and BAPM research lead.                                                                     |
| Kate Dinwiddy (KD)                  | Chief Executive of BAPM.                                                                                                                  |
| Katie Evans (KE)                    | Project Co-ordinator and Honorary Clinical Research Fellow in Neonatal Medicine.                                                          |
| Chris Gale (CG)                     | Professor of Neonatal Medicine and Neonatal Society Meeting Secretary.                                                                    |
| Katie Gallagher (KG)                | Academic Neonatal Nurse and Neonatal Nurses Association representative.                                                                   |
| Pollyanna Hardy (PH)                | Clinical Trials Statistician and Director of National Perinatal Epidemiology Unit Clinical Trials Unit.                                   |
| Emma Johnston (EJ)                  | Parent representative and Parents and Family engagement Lead with the Thames Valley and Wessex Operational Delivery Network.              |
| Helen Mactier (HM)                  | Consultant Neonatologist, Honorary Clinical Associate Professor and immediate past president of BAPM.                                     |
| Claire Marcroft (CM)                | Neonatal Physiotherapist and Allied Health Professionals Representative.                                                                  |
| James Webbe (JW)                    | Trainee representative and Neonatal Medicine Trainee.                                                                                     |
